# Supplementary material for: Flow synthesis of hypercrosslinked polymers with additional microporosity that enhances CO2/N2separation
Source: Royal Society of Chemistry journal article supplement (doi:10.1039/d2ta09253k), 2023-01-01
Supplement: d2ta09253k1.pdf [file d2ta09253k1.pdf]

## Supplementary Information

### Flow synthesis of hypercrosslinked polymers with additional microporosity that enhance CO<sub>2</sub>/N<sub>2</sub> separations

Nadhita Chanchaona<sup>a</sup>, Liang Ding<sup>a</sup>, Shiliang Lin<sup>a</sup>, Sulaiman Sarwar<sup>a</sup>, Simone Dimartino<sup>a</sup>, Ashleigh J. Fletcher<sup>b</sup>, Daniel M. Dawson<sup>c</sup>, Kristina Konstas<sup>d</sup>, Matthew R. Hill<sup>d</sup>, Cher Hon Lau<sup>\*a</sup>

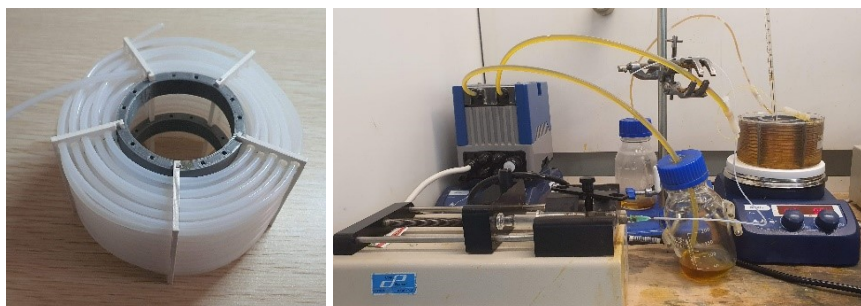

Figure S1 Coiled tubular reactor (Left) and actual set-up (Right)

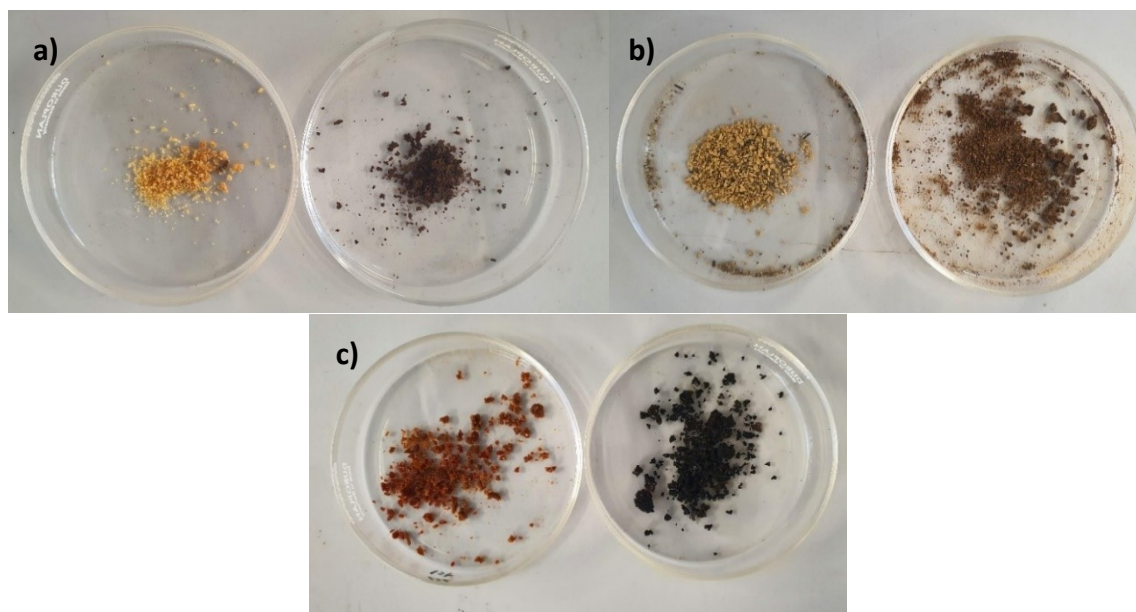

Figure S2 HCPs from the optimal flow-condition (Left) with their batch counterpart (Right): a) p-PS/DCX, b) p-DCX, and c) p-PS/FDA

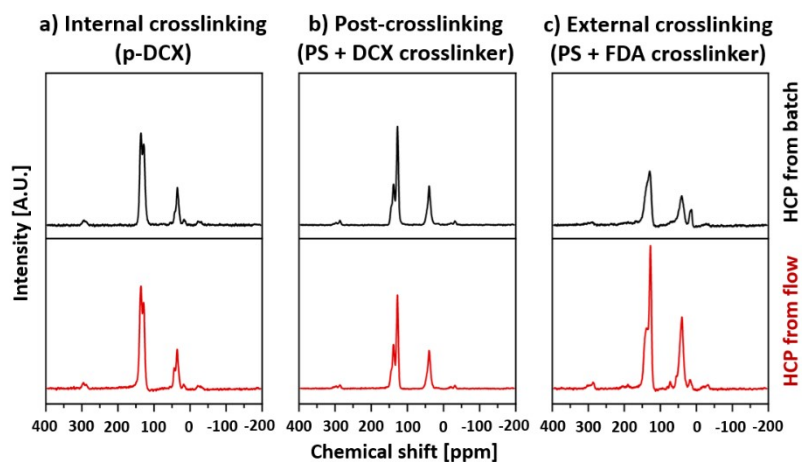

Figure S3  $^{13}\text{C}$ -NMR spectra (Full range from -200 to 400 ppm) of the HCPs

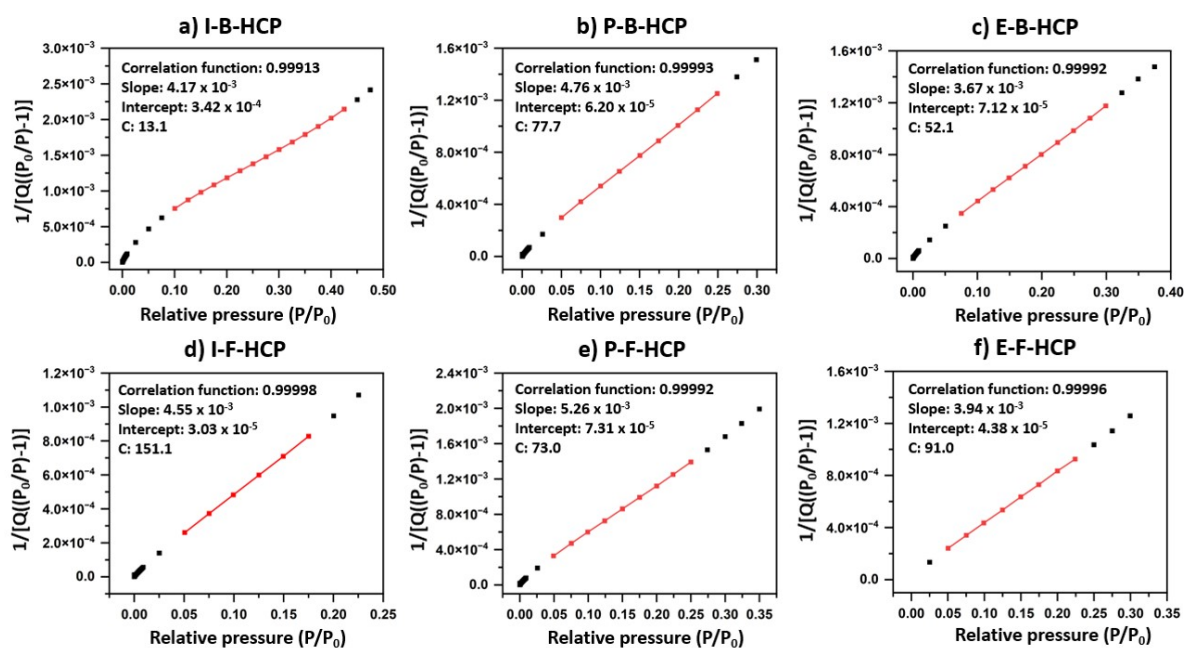

Figure S4 BET plots of six optimal HCP samples of each synthetic approaches (Internal crosslinking, post-crosslinking, and external crosslinking) and synthetic methods (Batch and flow). The fitting region following Rouquerol correction for microporous materials is shown in red dot and line together with correlation function, slope, intercept, and BET constant.

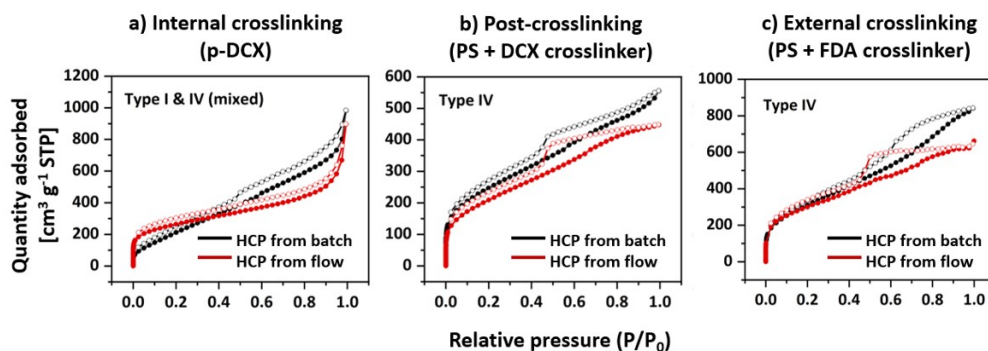

Figure S5  $\text{N}_2$  sorption at 77 K of HCP products. Adsorption isotherm is shown as filled dot marker. Desorption isotherm is shown as empty dot marker.

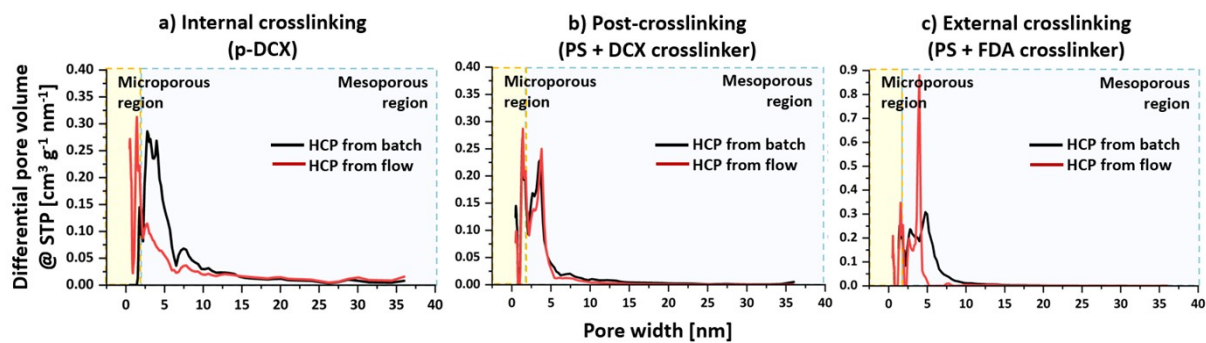

Figure S6 Pore size distribution from 0 – 40 nm pore width of flow-produced HCPs and their batch equivalents

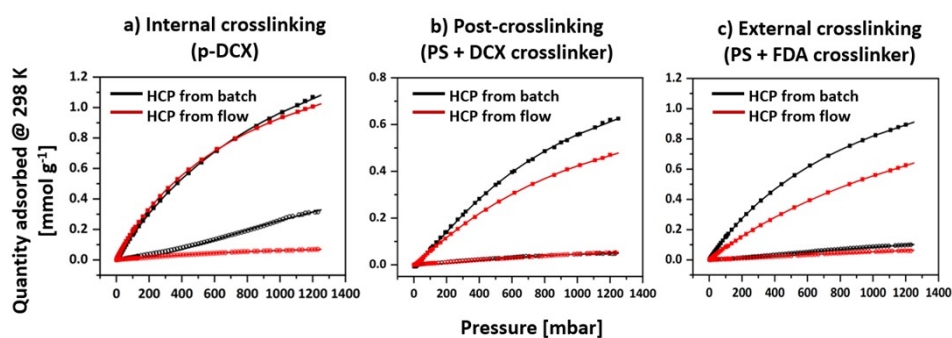

Figure S7 CO<sub>2</sub> uptake isotherms at 298 K. Experimental data is presented as marker points. IAST curve fitting is shown as solid lines. CO<sub>2</sub> adsorption is shown as filled square marker. N<sub>2</sub> adsorption is shown as empty circle marker.

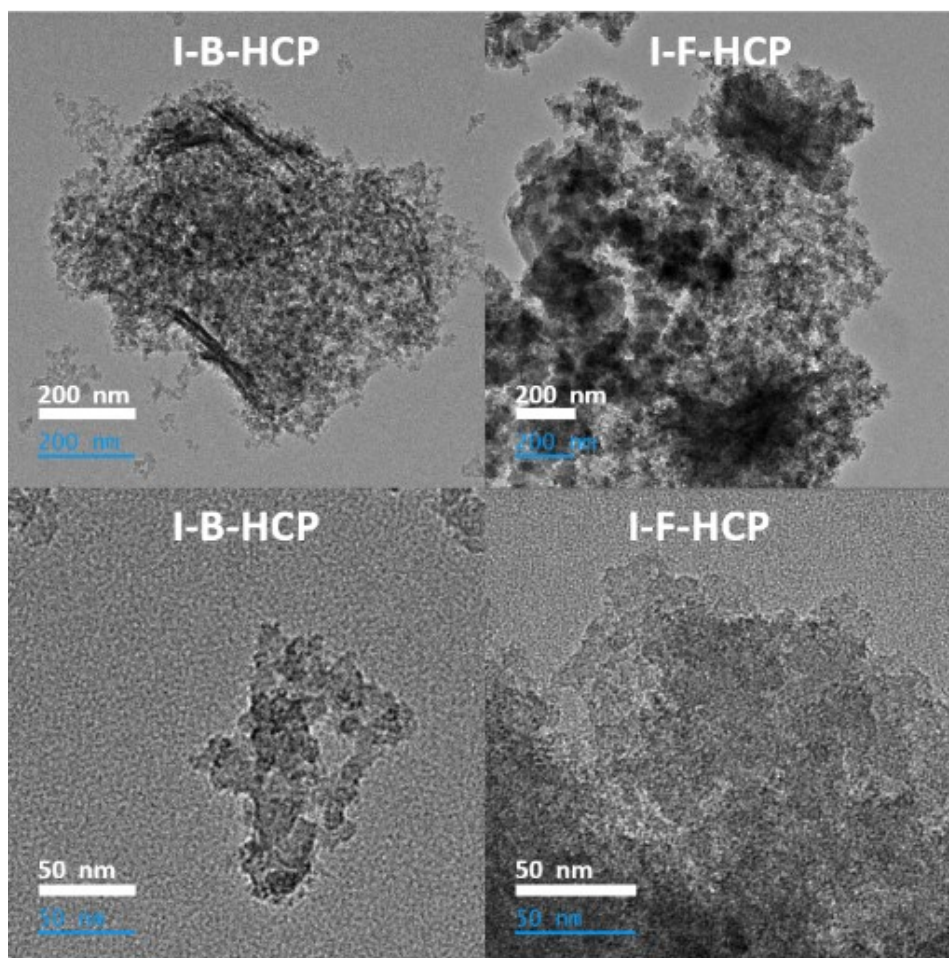

Figure S8 TEM images of I-B-HCP and I-F-HCP

Table S1 Operating parameters of batch production and correspond product yields

| Crosslinking approach | Substrate conc. [% w/v] | Substrate: FeCl <sub>3</sub> : Crosslinker | Temp. [K] <sup>24</sup> | Reaction time [day] <sup>41</sup> | Yield [%] | BET SA [m <sup>2</sup> g <sup>-1</sup> ] | Sample names |
|-----------------------|-------------------------|--------------------------------------------|-------------------------|-----------------------------------|-----------|------------------------------------------|--------------|
| Internal crosslinking | 1.923                   | 1:1:0 (mol)                                | 373                     | 24                                | 64.42     | 686.356                                  | -            |
|                       | 2.884                   | 1:1:0 (mol)                                | 373                     | 24                                | 58.50     | 964.309                                  | I-B-HCP      |
| Post-crosslinking     | 0.385                   | 1:1:1 (wt)                                 | 353                     | 24                                | 155.38    | 903.183                                  | P-B-HCP      |
| External crosslinking | 0.762                   | 1:5:5 (wt)                                 | 353                     | 24                                | 156.63    | 1161.864                                 | E-B-HCP      |

Table S2 Operating parameters of flow production and correspond product yields

| Internal crosslinking approach |                                           |           |                                   |                      |           |                                          |              |
|--------------------------------|-------------------------------------------|-----------|-----------------------------------|----------------------|-----------|------------------------------------------|--------------|
| DCX conc. [% w/v]              | DCX:FeCl <sub>3</sub> (molar ratio)       | Temp. [K] | Flow rate [mL min <sup>-1</sup> ] | Residence time [min] | Yield [%] | BET SA [m <sup>2</sup> g <sup>-1</sup> ] | Sample names |
| 0.962                          | 1:1                                       | 343       | 1.94                              | 15                   | Unreacted | N.A.                                     | -            |
| 0.962                          | 1:1                                       | 343       | 1.46                              | 20                   | 3.59      | N.A.                                     | -            |
| 1.923                          | 1:1                                       | 343       | 2.94                              | 10                   | Unreacted | N.A.                                     | -            |
| 1.923                          | 1:1                                       | 343       | 2.26                              | 13                   | 12.19     | 542.197                                  | -            |
| 1.923                          | 1:1                                       | 343       | 1.94                              | 15                   | Clogged   | N.A.                                     | -            |
| 2.884                          | 1:1                                       | 343       | 9.40                              | 3                    | Unreacted | N.A.                                     | -            |
| 2.884                          | 1:1                                       | 343       | 5.40                              | 5                    | 7.24      | 950.130                                  | I-F-HCP      |
| 2.884                          | 1:1                                       | 343       | 4.14                              | 7                    | Clogged   | N.A.                                     | -            |
| 0.673                          | 1:2                                       | 343       | 9.40                              | 3                    | 17.83     | 702.780                                  | -            |
| Post-crosslinking approach     |                                           |           |                                   |                      |           |                                          |              |
| PS conc. [%w/v]                | PS:FeCl <sub>3</sub> : DCX (weight ratio) | Temp. [K] | Flow rate [mL min <sup>-1</sup> ] | Residence time [min] | Yield [%] | BET SA [m <sup>2</sup> g <sup>-1</sup> ] | Sample names |

---

|       |       |     |      |    |           |         |         |
|-------|-------|-----|------|----|-----------|---------|---------|
| 0.385 | 1:1:1 | 343 | 4.14 | 7  | Unreacted | N.A.    | -       |
| 0.385 | 1:1:1 | 343 | 2.94 | 10 | 126.72    | 815.900 | P-F-HCP |
| 0.385 | 1:1:1 | 343 | 2.26 | 13 | 133.51    | 771.330 | -       |
| 0.385 | 1:1:1 | 343 | 1.94 | 15 | Clogged   | N.A.    | -       |
| 0.577 | 1:1:1 | 343 | 9.40 | 3  | Clogged   | N.A.    | -       |
| 0.385 | 1:2:2 | 343 | 9.40 | 3  | 119.15    | N.A.    | -       |
| 0.385 | 1:2:2 | 343 | 5.40 | 5  | Clogged   | N.A.    | -       |

---

**External crosslinking approach**

| PS conc.<br>[%w/v] | PS:FeCl <sub>3</sub> :   |              | Flow rate<br>[mL min <sup>-1</sup> ] | Residence<br>time [min] | Yield [%] | BET SA<br>[m <sup>2</sup> g <sup>-1</sup> ] | Sample<br>names |
|--------------------|--------------------------|--------------|--------------------------------------|-------------------------|-----------|---------------------------------------------|-----------------|
|                    | FDA<br>(weight<br>ratio) | Temp.<br>[K] |                                      |                         |           |                                             |                 |
| 0.762              | 1:5:5                    | 343          | 2.94                                 | 10                      | 85.30     | 711.388                                     | -               |
| 0.762              | 1:5:5                    | 343          | 2.26                                 | 13                      | 103.70    | 893.733                                     | -               |
| 0.762              | 1:5:5                    | 343          | 1.94                                 | 15                      | 114.30    | 1091.656                                    | E-F-HCP         |
| 0.762              | 1:5:5                    | 343          | 1.74                                 | 17                      | 98.01     | 647.282                                     | -               |
| 0.762              | 1:5:5                    | 343          | 1.46                                 | 20                      | 94.51     | 377.181                                     | -               |
| 0.962              | 1:1:1                    | 343          | 2.94                                 | 10                      | Unreacted | N.A.                                        | -               |
| 0.962              | 1:3:3                    | 343          | 2.94                                 | 10                      | 69.48     | 28.542                                      | -               |
| 0.962              | 1:5:5                    | 343          | 2.94                                 | 10                      | 102.47    | 534.331                                     | -               |
| 0.577              | 1:5:5                    | 323          | 2.94                                 | 10                      | Unreacted | N.A.                                        | -               |
| 0.577              | 1:5:5                    | 333          | 2.94                                 | 10                      | 97.65     | 214.311                                     | -               |
| 0.577              | 1:5:5                    | 343          | 2.94                                 | 10                      | 99.17     | 671.391                                     | -               |
| 0.385              | 1:5:5                    | 343          | 2.94                                 | 10                      | 80.65     | 296.193                                     | -               |
| 0.577              | 1:5:5                    | 343          | 2.94                                 | 10                      | 99.17     | 671.391                                     | -               |
| 0.762              | 1:5:5                    | 343          | 2.94                                 | 10                      | 110.74    | 605.777                                     | -               |
| 0.962              | 1:5:5                    | 343          | 2.94                                 | 10                      | 102.47    | 534.331                                     | -               |

Table S3 Micropore volumes, and STY of flow-produced external crosslinked HCPs from different synthesis parameters

| Residence time [min] | DFT micropore<br>volume [cm <sup>3</sup> g <sup>-1</sup> ] | Space-time-yield [mg mL <sup>-1</sup> day <sup>-1</sup> ] |
|----------------------|------------------------------------------------------------|-----------------------------------------------------------|
| 10                   | 0.042150                                                   | 964.514                                                   |
| 13                   | 0.083919                                                   | 897.427                                                   |
| 15                   | 0.292950                                                   | 691.573                                                   |
| 17                   | 0.198340                                                   | 652.577                                                   |
| 20                   | 0.101110                                                   | 526.243                                                   |

| PS:FeCl <sub>3</sub> :FDA (weight ratio) | DFT micropore volume [cm <sup>3</sup> g <sup>-1</sup> ] | Space-time-yield [mg mL <sup>-1</sup> day <sup>-1</sup> ] |
|------------------------------------------|---------------------------------------------------------|-----------------------------------------------------------|
| 1:1:1                                    | N.A.                                                    | N.A.                                                      |
| 1:3:3                                    | 0.006543                                                | 981.166                                                   |
| 1:5:5                                    | 0.104223                                                | 1447.037                                                  |

  

| Temperature [K] | DFT micropore volume [cm <sup>3</sup> g <sup>-1</sup> ] | Space-time-yield [mg mL <sup>-1</sup> day <sup>-1</sup> ] |
|-----------------|---------------------------------------------------------|-----------------------------------------------------------|
| 323             | N.A.                                                    | N.A.                                                      |
| 333             | 0.058939                                                | 828.693                                                   |
| 343             | 0.108909                                                | 841.592                                                   |

  

| PS concentration [% w/v] | DFT micropore volume [cm <sup>3</sup> g <sup>-1</sup> ] | Space-time-yield [mg mL <sup>-1</sup> day <sup>-1</sup> ] |
|--------------------------|---------------------------------------------------------|-----------------------------------------------------------|
| 0.40                     | 0.079204                                                | 457.185                                                   |
| 0.60                     | 0.108909                                                | 841.592                                                   |
| 0.80                     | 0.115116                                                | 1252.172                                                  |
| 1.00                     | 0.104223                                                | 1447.037                                                  |

\* DFT micropore volume data was obtained from the cumulative pore volume of the pore size up to 2 nm

Table S4 Surface area, volume, and specific area of batch and flow reactors

| Reactor types                          | Reactor surface area [m <sup>2</sup> ] | Reactor volume [m <sup>3</sup> ] | Reactor specific areas [m <sup>2</sup> m <sup>-3</sup> ] |
|----------------------------------------|----------------------------------------|----------------------------------|----------------------------------------------------------|
| Batch: 250mL three neck round bottle * | 0.0101                                 | 1.340 x 10 <sup>-4</sup>         | 75                                                       |
| Flow: Helical coil reactor             | 0.1520                                 | 2.988 x 10 <sup>-5</sup>         | 5087                                                     |

\* Assumed the sphere shape bottle of 8 cm diameter is half filled

Table S5 Reynolds numbers from the synthesis of externally crosslinked HCPs in flow reactor at different residence times

| Residence time [min] | Volumetric flow rate [mL min <sup>-1</sup> ] | Feed flow velocity [m s <sup>-1</sup> ] | Reynolds number* |
|----------------------|----------------------------------------------|-----------------------------------------|------------------|
| 10                   | 2.94                                         | 0.02499                                 | 98.14            |
| 13                   | 2.26                                         | 0.01921                                 | 75.44            |
| 15                   | 1.94                                         | 0.01649                                 | 64.76            |
| 17                   | 1.74                                         | 0.01479                                 | 58.08            |
| 20                   | 1.46                                         | 0.01241                                 | 48.73            |

\*  $Re = \frac{\rho V D}{\mu} = \frac{\rho F D}{\mu A_{cross}}$  where  $\rho$  [kg m<sup>-3</sup>] is fluid density;  $V$  [m s<sup>-1</sup>] is fluid velocity;  $D$  [mm] is tube inner diameter;  $\mu$  [mPa · s] is fluid dynamic viscosity;  $F$  [mL min<sup>-1</sup>] is fluid volumetric flow rate; and  $A_{cross}$  [mm<sup>2</sup>] is cross-sectional area of the tube

\*\* DCE thermodynamic properties at 343 K are  $\mu = 0.476 \text{ mPa} \cdot \text{s}$  and  $\rho = 1183 \text{ kg m}^{-3}$

\*\*\*  $D = 1.58 \text{ mm}$ , thus  $A_{cross} = 1.96 \text{ mm}^2$

Table S6 Single site Langmuir-Freundlich parameters of HCPs for CO<sub>2</sub>/N<sub>2</sub> selectivity calculation

| Samples | CO <sub>2</sub> |                       |         |         | N <sub>2</sub> |                       |         |         |
|---------|-----------------|-----------------------|---------|---------|----------------|-----------------------|---------|---------|
|         | $q$             | $k$                   | $n$     | $R^2$   | $q$            | $k$                   | $n$     | $R^2$   |
| I-B-HCP | 2.08438         | $8.45 \times 10^{-4}$ | 1.00271 | 0.99984 | 0.69661        | $1.69 \times 10^{-6}$ | 1.84764 | 0.99632 |
| I-F-HCP | 1.78092         | $1.44 \times 10^{-3}$ | 0.96006 | 0.99999 | 0.13976        | $5.43 \times 10^{-4}$ | 1.05481 | 0.99868 |
| P-B-HCP | 1.00444         | $1.99 \times 10^{-4}$ | 1.26554 | 0.99906 | 0.05773        | $2.72 \times 10^{-6}$ | 2.03761 | 0.98983 |
| P-F-HCP | 0.87939         | $4.03 \times 10^{-4}$ | 1.12066 | 0.99984 | 0.09412        | $2.50 \times 10^{-5}$ | 1.52846 | 0.99668 |
| E-B-HCP | 1.68105         | $1.07 \times 10^{-3}$ | 0.98250 | 0.99999 | 0.20433        | $3.33 \times 10^{-5}$ | 1.44437 | 0.99944 |
| E-F-HCP | 1.70057         | $5.57 \times 10^{-4}$ | 0.98019 | 0.99997 | 0.15265        | $9.61 \times 10^{-5}$ | 1.24803 | 0.99895 |



## Estimation of Reynolds number in batch reactor

The Reynolds number in our batch reactor (250 mL three neck round bottom flask) was estimated using an equation for a propeller turbine mixer tank<sup>42</sup> in which the propeller is equivalent to the stirrer bar in our work. The thermodynamic properties of feed fluid mixture were assumed as pure DCE at 343 K since the concentration of feed was considerably low. The equation is shown as follows:

$$Re = ND^2 \frac{\rho}{\mu}$$

$N$  [rps] is rotational speed of the stirrer bar, which was set to 250 rpm or 4.167 rps

$D$  [m] is diameter of the stirrer bar, which was 0.025 m

$\mu$  [mPa · s] is fluid dynamic viscosity, which is 0.476 mPa s

$\rho$  [kg m<sup>-3</sup>] is fluid density, which is 1183 kg m<sup>-3</sup>

After substituting with values, we got the solution of  $Re = 6524$ .
